# Supplementary material for: Peripheral Blood T Cells of Patients with IPAH Have a Reduced Cytokine-Producing Capacity
Source: MDPI journal article supplement (doi:10.3390/ijms23126508), 2022-06-10
Supplement: s1 [file s1]

**Table S1.** Characteristics of CD4<sup>+</sup> Th subsets.

| CD4 <sup>+</sup> T cell subsets   |                                            |                                       |                                            |                                            |                                              |
|-----------------------------------|--------------------------------------------|---------------------------------------|--------------------------------------------|--------------------------------------------|----------------------------------------------|
|                                   | Th1                                        | Th2                                   | Th17                                       | Tfh                                        | Treg                                         |
| Cytokines driving differentiation | IL-12, IFN $\gamma$                        | IL-4                                  | IL-6, IL-23, IL-21, TGF $\beta$            | IL-21, IL-6, IL-27, IL-12                  | IL-2, TGF $\beta$                            |
| Major function                    | Protection against intracellular pathogens | Protection against helminth infection | Protection against extracellular pathogens | Support to B cells in lymphocyte follicles | Maintaining immune tolerance                 |
| Pathological conditions           | Autoimmunity                               | Allergy                               | Autoimmunity                               | Autoimmunity                               | Lymphoproliferative disease and autoimmunity |
| Key transcription factors         | T-bet                                      | GATA3                                 | ROR $\gamma$ t                             | BCL6                                       | FoxP3                                        |
| Key surface molecule              | CXCR3                                      | CCR4                                  | CCR6                                       | CXCR5                                      | CTLA4                                        |
| Effector cytokines                | IFN $\gamma$                               | IL-4, IL-5, IL-13                     | IL-17, IL-22                               | IL-21, IL-10                               | IL-10, TGF $\beta$                           |

Abbreviations: Th, T-helper; IL, interleukin; IFN $\gamma$ , interferon  $\gamma$ ; TGF $\beta$ , transforming growth factor  $\beta$ ; CTLA4, cytotoxic T lymphocyte antigen 4. References used: [1-4].

**Table S2.** Baseline demographic and patient characteristics.

| DC staining (baseline)                      | PAH - BASELINE  |                 |              |
|---------------------------------------------|-----------------|-----------------|--------------|
|                                             | IPAH (n=12)     | CTD-PAH (n=17)  | p Value      |
| <b>Baseline clinical characteristics</b>    |                 |                 |              |
| Gender, female (%)                          | 11 (92%)        | 13 (76%)        |              |
| Age, y                                      | 57.2 $\pm$ 18.3 | 65.8 $\pm$ 11.2 | 0.37         |
| BMI, kg/m <sup>2</sup>                      | 26.5 $\pm$ 4.7  | 26.1 $\pm$ 5.4  | 0.71         |
| NYHA class 3-4, n (%)                       | 9 (75%)         | 11 (65%)        |              |
| 6MWT, m                                     | 354 $\pm$ 109   | 300 $\pm$ 133   | 0.40         |
| NT-pro BNP, pmol/L                          | 236 $\pm$ 301   | 650 $\pm$ 1213  | 0.61         |
| Underlying CTD                              |                 |                 |              |
| SSc, n (%)                                  |                 | 14/17 (82%)     |              |
| SLE, n (%)                                  |                 | 3/17 (18%)      |              |
| <b>Baseline right heart catheterization</b> |                 |                 |              |
| mPAP, mmHg                                  | 55.8 $\pm$ 16.5 | 41.7 $\pm$ 13.0 | <b>0.008</b> |
| mRAP, mmHg                                  | 11.6 $\pm$ 6.0  | 9.4 $\pm$ 5.8   | 0.21         |
| Capillary wedge pressure, mmHg              | 9.0 $\pm$ 5.3   | 11.3 $\pm$ 5.9  | 0.31         |
| PVR, wood units                             | 9.7 $\pm$ 3.0   | 6.6 $\pm$ 3.6   | 0.02         |
| <b>Immunomodulatory drugs</b>               |                 |                 |              |
| At baseline, n (%)                          | 0/12 (0%)       | 1/17 (6%)       |              |

Data given as 'mean,  $\pm$ SD', unless otherwise indicated. **Abbreviations:** BMI, body mass index; PAH, pulmonary arterial hypertension; IPAH, idiopathic pulmonary arterial hypertension; CTD, connective tissue disease; 6MWT, 6-minute walk test; NT-pro BNP, The N-terminal prohormone of brain natriuretic peptide; SSc, systemic sclerosis; SLE, systemic lupus erythematosus; mPAP, mean pulmonary arterial pressure; mRAP, mean right atrium pressure; PVR, pulmonary vascular resistance.

**Table S3.** Monoclonal antibodies used for flow cytometry.

| <b>Antibody</b> | <b>Conjugate</b> | <b>Clone</b> | <b>Company</b>  |
|-----------------|------------------|--------------|-----------------|
| CD4             | FITC             | Okt4         | Biolegend       |
| CD45RA          | BV650            | HI100        | BD              |
| CD3             | Biotin           | UCHT         | eBioscience     |
| CD8             | AF700            | SK1          | Biolegend       |
| CD25            | Pe-Cy7           | M-A251       | BD              |
| CD127           | BV421            | A019D5       | Biolegend       |
| Streptavidin    | BV605            | -            | BD              |
| IL-10           | PCP              | JES3-9D7     | Biolegend       |
| IL-4            | APC-Cy7          | MP4-25D2     | Biolegend       |
| IL-6            | PE               | MQ2-13A5     | eBioscience     |
| IFN $\gamma$    | BV711            | B27          | BD              |
| IL-17a          | BV786            | N49-653      | BD              |
| TNF $\alpha$    | APC              | 6401.111     | BD              |
| GM-CSF          | PE TxR           | BVD2-21C11   | BD              |
| CCR4            | FITC             | -            | R&D             |
| CD45RA          | PE TxR           | MEM-56       | Life technology |
| CD4             | PercPcy5.5       | RPA-T4       | Invitrogen      |
| CXCR5           | Pe-Cy7           | MU5UBEE      | eBioscience     |
| ICOS            | BV650            | C3984A       | Biolegend       |
| CXCR3           | BV711            | 1C6/CXCR3    | BD              |
| PD-1            | BV786            | EH12.1       | BD              |
| CCR6            | APC              | 11A9         | BD              |
| CD3             | APC-Cy7          | UCHT1        | Invitrogen      |
| FoxP3           | PE               | 236A/E7      | Invitrogen      |
| CTLA4           | BV421            | BNI3         | BD              |
| CD16            | FITC             | 3G8          | BD              |
| PD-L1           | PE-CF594         | M1H1         | BD              |
| CD56            | Pe-Cy7           | B159         | BD              |
| AXL             | APC              | FAB154A      | R&D system      |
| CD3             | AF700            | UCHT1        | eBioscience     |
| CD19            | AF700            | HIB19        | eBioscience     |
| CD20            | AF700            | 2H7          | BD              |
| CD86            | Biotin           | FUN-1        | BD              |
| CD80            | BV421            | L307.4       | BD              |
| CD11c           | BV605            | 3.9          | Biolegend       |
| CD123           | BV650            | 7G3          | BD              |
| HLA-DR          | BV711            | G46-6        | BD              |
| CD14            | BV785            | M5E2         | BD              |
| Streptavidin    | APC-Cy7          | -            | eBioscience     |
| IRF4            | PE               | 3E4          | eBioscience     |
| IRF8            | PercPcy5.5       | V3GYWCH      | eBioscience     |

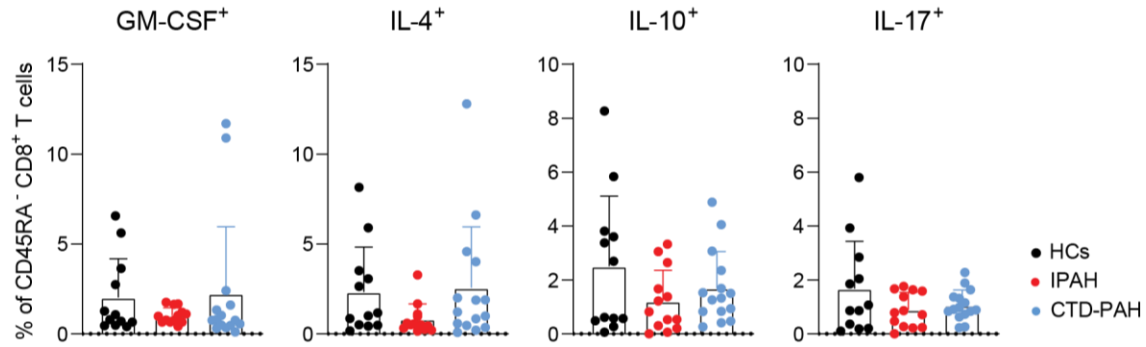

**Figure S1.** GM-CSF<sup>+</sup>, IL-4<sup>+</sup>, IL-10<sup>+</sup> and IL-17<sup>+</sup> memory CD8<sup>+</sup> T cells in IPAHA and CTD-PAH patients do not differ from HCs. Quantification of the indicated cytokines in CD45RA<sup>-</sup> CD8<sup>+</sup> T cells. Results are presented as mean + standard deviation, Mann-Whitney U test was used for statistical analysis. Symbols represent values of individual patients or HCs.

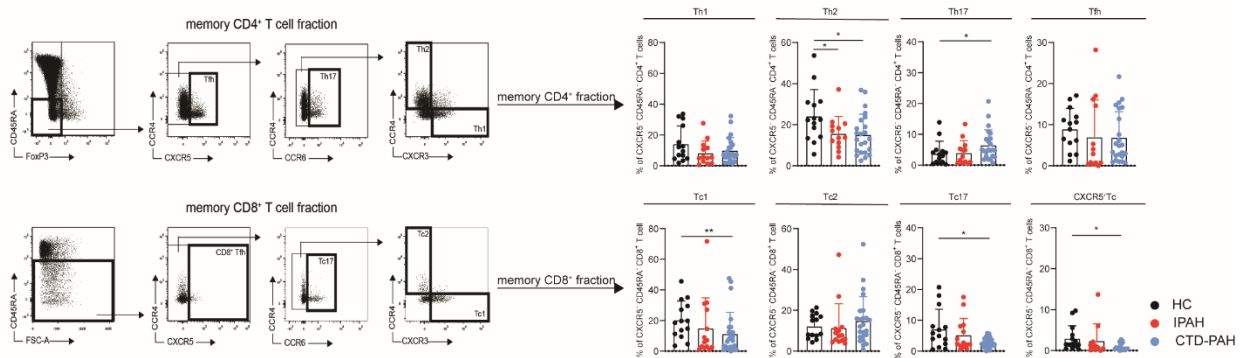

**Figure S2.** Frequency of Th2 cells is higher in PAH patients than in HCs. Gating strategy for peripheral blood Th subsets based on chemokine receptor expression (*left*) and percentages of circulating Th cells (*right*) of the indicated T cell subsets for HCs, IPAHA and CTD-PAH patients at diagnosis, as determined by flow cytometry. Symbols represent values of individual patients or HCs. Results are presented as mean + standard deviation, Mann-Whitney U test was used for statistical analysis, \*  $p < 0.05$ , \*\*  $p < 0.01$ .

**(A)**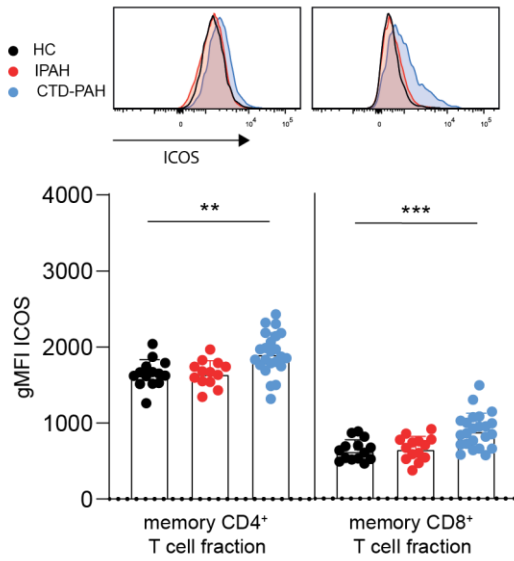**(B)**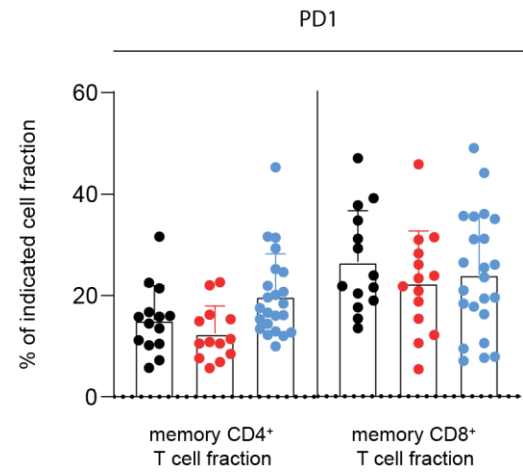

**Figure S3.** Increased ICOS expression on T cells of CTD-PAH patients. (A) Histogram overlays (*top*) and quantification (*bottom*) of ICOS expression, as determined by flow cytometry in HCs, IPAHA and CTD-PAH patients. (B) Quantification of PD-1<sup>+</sup> memory CD4<sup>+</sup> and memory CD8<sup>+</sup> T cells. Samples with <500 events in parent gate were excluded (HC n= 14, IPAHA n=12-15 and CTD-PAH n=22-23). Results are presented as mean + standard deviation; symbols represent values of individual patients or HCs. Mann-Whitney U test was used for statistical analysis, \*\* p<0.01, \*\*\* p<0.001. gMFI = geometric mean fluorescence intensity.

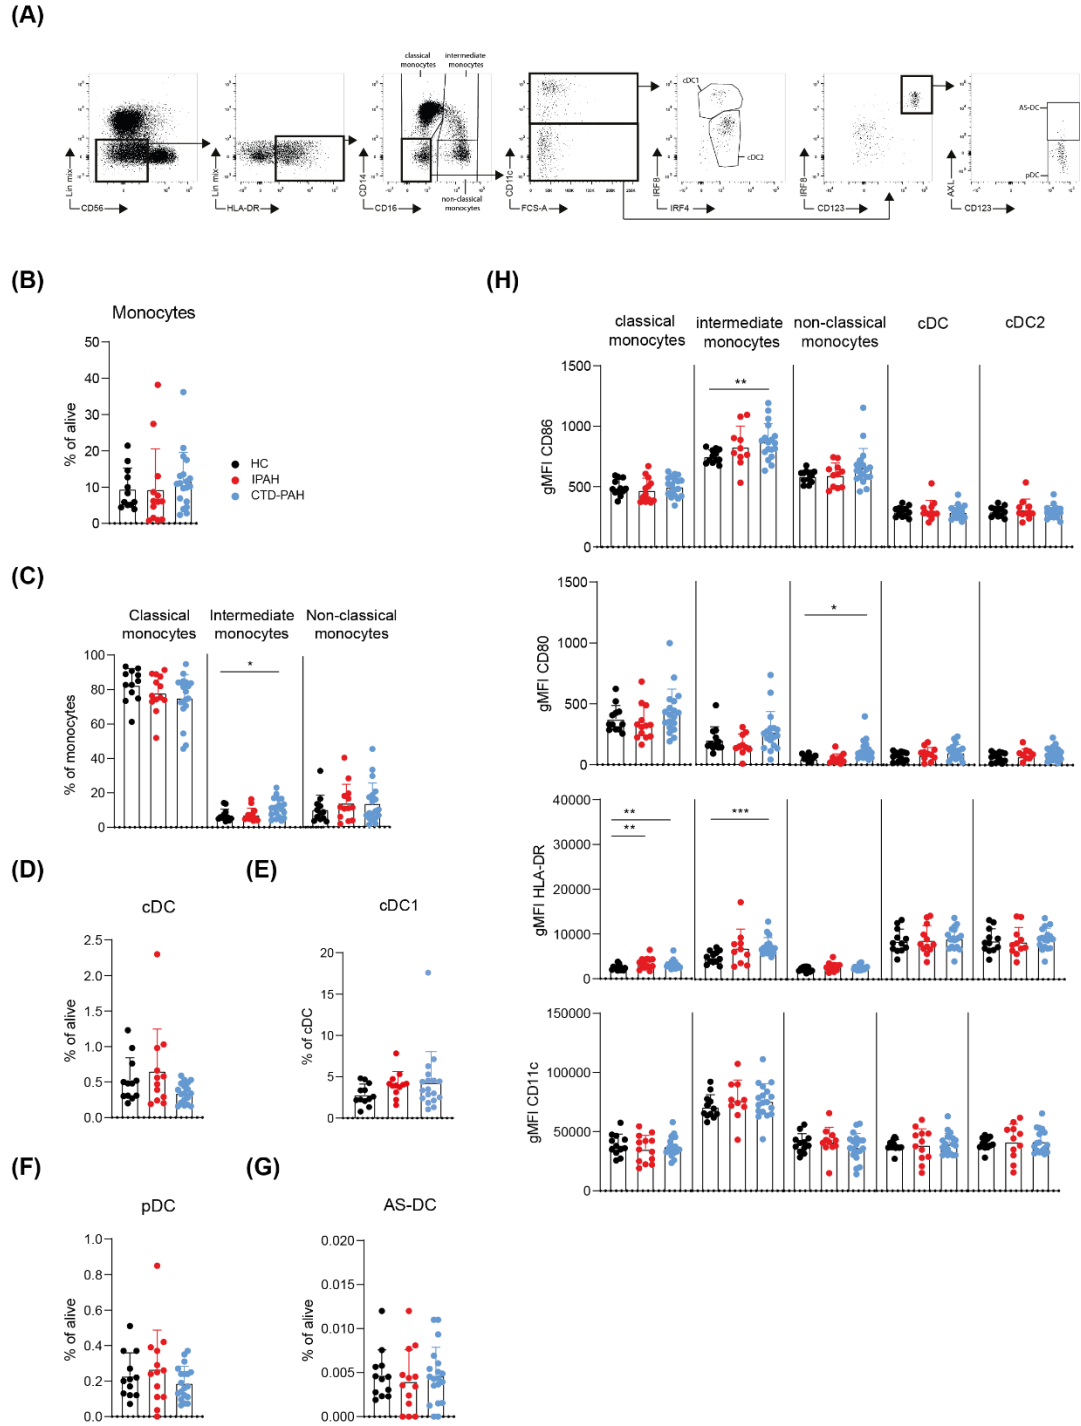

**Figure S4.** Limited differences in peripheral blood monocytes and dendritic cells between IPAHA or CTD-PAH patients and HCs. (A) Flow cytometric gating strategy of monocyte and dendritic cell (DC) subsets. (B-G) Quantification of proportions of monocytes (B), monocyte subsets (C), conventional DCs (cDCs) (D), type 1 cDCs (cDC1) (E), plasmacytoid DCs (pDCs) (F) and AXL<sup>+</sup> Siglec<sup>+</sup> DCs (AS-DCs) (G). (H) Expression of the indicated activation markers on monocyte and DC subsets. Results are presented as mean + standard deviation; symbols represent values of individual patients or HCs. Mann-Whitney U test was used for statistical analysis, \*  $p < 0.05$ , \*\*  $p < 0.01$ , \*\*\*  $p < 0.001$ . gMFI = geometric mean fluorescence intensity.

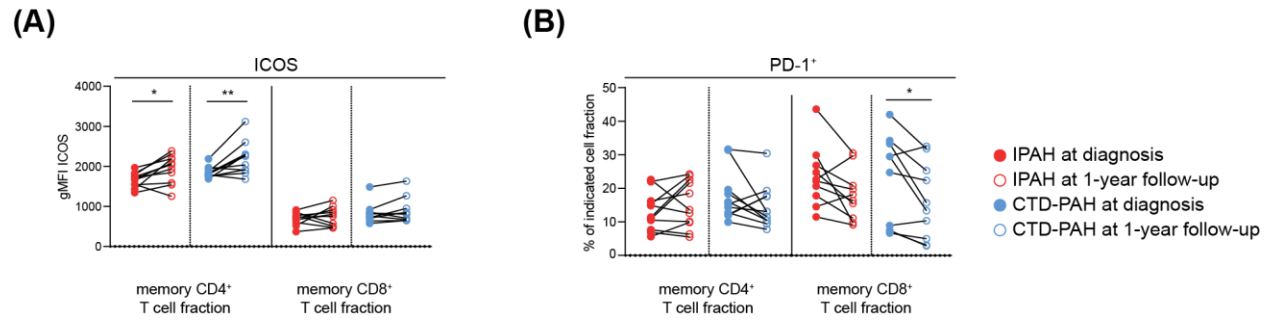

**Figure S5.** PD-1 and CTLA4 expression in PAH patients changes over time. (A-B) Quantification of ICOS expression (A) and PD-1 (B) in the indicated T cell fractions in samples from IPAH and CTD-PAH patients at diagnosis and 1-year follow-up, as determined by flow cytometry. Closed and open circles represent values of individual patients at diagnosis or 1-year follow-up, respectively. Paired samples are connected by lines. Wilcoxon matched-pairs signed rank test was used for statistical analysis, \*  $p < 0.05$ , \*\*  $p < 0.01$ . gMFI = geometric mean fluorescence intensity.

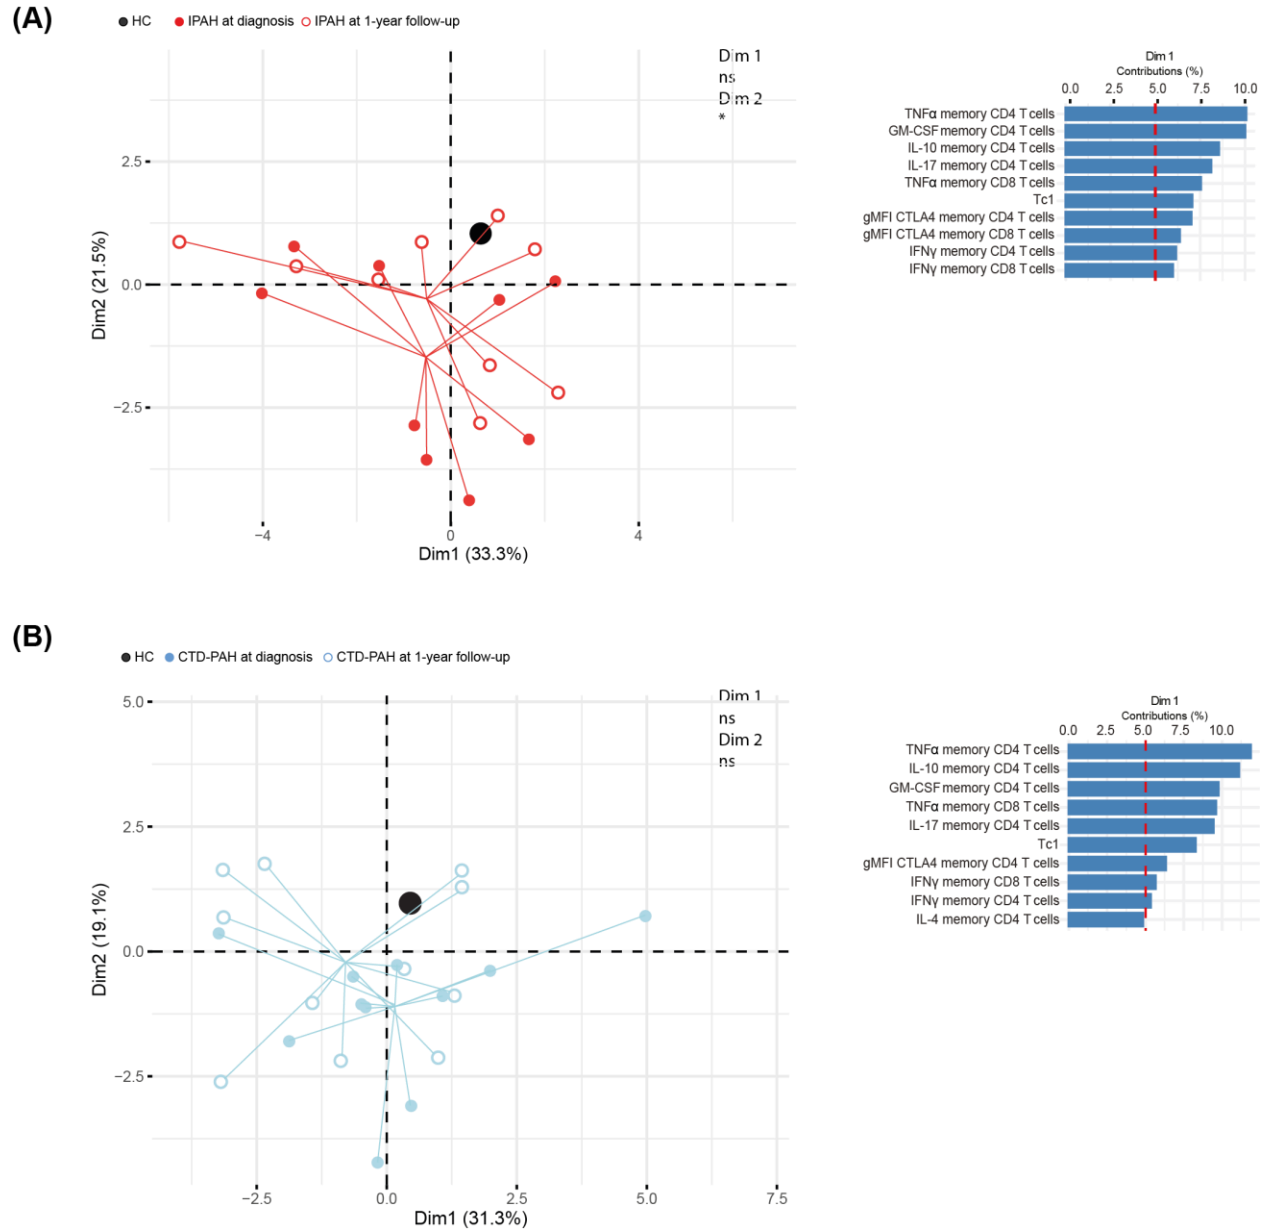

**Figure S6.** Multivariate analysis of IPAH patients and CTD-PAH patients at diagnosis and 1-year follow-up. (A-B) Principal component analysis (PCA) of IPAH patients (n=9) (A) and CTD-PAH patients (n=11) of whom all variables (peripheral T cell subsets, activation markers and cytokine production) could be determined by flow cytometry at 1-year follow-up (*left*), with the contributions of the top 10 variables in percentages of Dim1 and Dim2 (*right*). Symbols represent values of individual patients or HCs, whereby lines connect these values to the mean Dim1 and Dim2 coordinates. Mean coordinates of HCs are indicated in black. Wilcoxon matched-pairs signed rank test was used for statistical analysis. \* p<0.05.

## References

1. Stadhouders, R., E. Lubberts, and R.W. Hendriks, *A cellular and molecular view of T helper 17 cell plasticity in autoimmunity*. J Autoimmun, 2018. 87: p. 1-15.
2. van Hamburg, J.P. and S.W. Tas, *Molecular mechanisms underpinning T helper 17 cell heterogeneity and functions in rheumatoid arthritis*. J Autoimmun, 2018. 87: p. 69-81.

3. Tesmer, L.A., et al., *Th17 cells in human disease*. Immunol Rev, 2008. **223**: p. 87-113.
4. Rakebrandt, N., K. Littringer, and N. Joller, *Regulatory T cells: balancing protection versus pathology*. Swiss Med Wkly, 2016. **146**: p. w14343.
